# Supplementary material
Source: PubMed Central journal article supplement (PMC7884095)
Supplement: NIHMS1644006-supplement-supp__info.pdf [file NIHMS1644006-supplement-supp__info.pdf]

# Supplementary Information

## Indoor secondary organic aerosols: towards an improved representation of their formation and composition in models

Kruza M.<sup>a</sup>, McFiggans G.<sup>b</sup>, Waring M.S.<sup>c</sup>, Wells J.R.<sup>d</sup>, Carslaw N.<sup>a</sup> \*

<sup>a</sup> Department of Environment and Geography, University of York, Wentworth Way, York YO10 5NG, UK

<sup>b</sup> School of Earth and Environmental Sciences, University of Manchester, Manchester, UK

<sup>c</sup> Department of Civil, Architectural and Environmental Engineering, Drexel University, Philadelphia, PA, USA

<sup>d</sup> National Institute for Occupational Safety and Health, Morgantown, West Virginia, USA

\* Corresponding author:

Nicola Carslaw

Department of Environment and Geography, University of York, Wentworth Way, York YO10 5NG, UK

Tel: +44 1904 324777

Email address: nicola.carslaw@york.ac.uk

30 **Table S1** HOM and HOMDIMER reaction rate coefficients.

| Reaction                                                     | Rate coefficient [cm <sup>3</sup> molecule <sup>-1</sup> s <sup>-1</sup> ] |
|--------------------------------------------------------------|----------------------------------------------------------------------------|
| $\alpha$ -pinene + O <sub>3</sub> → HOMRO <sub>2</sub>       | $6.3 \times 10^{-16} \times \exp^{(-580/T)} \times f1$                     |
| $\alpha$ -pinene + OH → HOMRO <sub>2</sub>                   | $1.2 \times 10^{-11} \times \exp^{(440/T)} \times f2$                      |
| HOMRO <sub>2</sub> + HO <sub>2</sub> → HOM                   | $2.91 \times 10^{-13} \times \exp^{(1300/T)} \times f3$                    |
| HOMRO <sub>2</sub> + NO → HOM                                | $2.7 \times 10^{-12} \times \exp^{(360/T)} \times f4$                      |
| HOMRO <sub>2</sub> + NO → HOMRO + NO <sub>2</sub>            | $2.7 \times 10^{-12} \times \exp^{(360/T)} \times f5$                      |
| HOMRO → HOMRO <sub>2</sub>                                   | $1.0 \times 10^6$                                                          |
| HOMRO <sub>2</sub> + NO <sub>3</sub> → HOM + NO <sub>2</sub> | $2.3 \times 10^{-12}$                                                      |
| HOMRO <sub>2</sub> + RO <sub>2</sub> → HOM                   | $9.2 \times 10^{-14}$                                                      |
| HOMRO <sub>2</sub> + HOMRO <sub>2</sub> → HOMDIMER           | $1.0 \times 10^{-10}$                                                      |

31 f1 = 0.1; f2 = 0.08; f3 = 0.914\*; f4 = 0.23\*; f5 = 0.77\*; \*based on the  $\alpha$ -pinene oxidation  
32 mechanism in MCM

33

34

35

36 **Table S2** The root mean square (rms) difference between the average measured and mod-  
37 elled concentrations of SOA for the NVP method following  $\alpha$ -pinene ozonolysis averaged  
38 over the 60 minute experiment.

| 39 | Run number |                            | 60 min aver- |
|----|------------|----------------------------|--------------|
| 40 |            |                            | age          |
| 41 |            |                            |              |
| 42 |            |                            |              |
|    | 1          | O <sub>3</sub> 10%, OH 8%  | 0.24         |
|    | 2          | O <sub>3</sub> 15%, OH 8%  | 0.10         |
|    | 3          | O <sub>3</sub> 10%, OH 5%  | 0.30         |
|    | 4          | O <sub>3</sub> 15%, OH 5%  | 0.15         |
|    | 5          | O <sub>3</sub> 15%, OH 10% | 0.07         |
|    | 6          | O <sub>3</sub> 20%, OH 8%  | 0.04         |
|    | 7          | O <sub>3</sub> 20%, OH 10% | 0.08         |
|    | 8          | O <sub>3</sub> 10%, OH 0%  | 0.39         |
|    | 9          | O <sub>3</sub> 15%, OH 0%  | 0.25         |
|    | 10         | O <sub>3</sub> 20%, OH 0%  | 0.10         |
|    | 11         | O <sub>3</sub> 0%, OH 5%   | 0.59         |
|    | 12         | O <sub>3</sub> 0%, OH 8%   | 0.54         |
|    | 13         | O <sub>3</sub> 0%, OH 10%  | 0.51         |



44 **Table S3** Conditions and SOA measurement results of 21 chamber experiments together with modelling results performed for the EVAP, NVP  
 45 and MY method without and with HOM. Rms difference\* was calculated for 21 runs for the EVAP, NVP and MY method for 30 min results.  
 46 The measured and modelled results are in  $\mu\text{g m}^{-3}$ .

| No                 | AT  | NO <sub>2</sub> | NO2/AT | Measured | EVAP model |                |        |                | NVP model |                |        |                | MY model |                |        |                |
|--------------------|-----|-----------------|--------|----------|------------|----------------|--------|----------------|-----------|----------------|--------|----------------|----------|----------------|--------|----------------|
|                    |     |                 |        |          | 30 min     | Rms difference | 30 min | Rms difference | 30 min    | Rms difference | 30 min | Rms difference | 30 min   | Rms difference | 30 min | Rms difference |
|                    |     |                 |        |          |            |                | HOM    | HOM            |           |                |        |                |          |                |        |                |
| 1                  | 20  | 2000            | 100    | 1.66     | 0.1        | 0.93           | 2.7    | 0.60           | 0.1       | 0.92           | 2.7    | 0.62           | 0.1      | 0.94           | 2.6    | 0.59           |
| 2                  | 20  | 200             | 10     | 6.65     | 0.3        | 0.96           | 3.6    | 0.46           | 0.4       | 0.94           | 3.8    | 0.43           | 0.1      | 0.98           | 3.4    | 0.48           |
| 3                  | 50  | 500             | 10     | 21.9     | 0.5        | 0.98           | 8.9    | 0.59           | 1.4       | 0.93           | 9.8    | 0.55           | 0.1      | 0.99           | 8.3    | 0.62           |
| 4                  | 20  | 40              | 2      | 14.7     | 1.2        | 0.92           | 5.4    | 0.63           | 2.0       | 0.86           | 6.0    | 0.59           | 0.2      | 0.99           | 4.6    | 0.69           |
| 5                  | 50  | 100             | 2      | 52       | 4.2        | 0.92           | 14.3   | 0.73           | 11.2      | 0.79           | 18.1   | 0.65           | 0.6      | 0.99           | 11.3   | 0.78           |
| 6                  | 100 | 200             | 2      | 155      | 15.6       | 0.90           | 32.3   | 0.79           | 56.4      | 0.64           | 52.7   | 0.66           | 1.5      | 0.99           | 22.9   | 0.85           |
| 7                  | 50  | 50              | 1      | 51.8     | 8.7        | 0.83           | 18.4   | 0.64           | 18.9      | 0.63           | 24.4   | 0.53           | 1.5      | 0.97           | 12.8   | 0.75           |
| 8                  | 100 | 100             | 1      | 141      | 29.3       | 0.79           | 43.6   | 0.69           | 79.4      | 0.44           | 74.5   | 0.47           | 4.6      | 0.97           | 26.8   | 0.81           |
| 9                  | 20  | 10              | 0.5    | 8.98     | 4.1        | 0.54           | 8.5    | 0.06           | 6.0       | 0.34           | 9.7    | 0.08           | 0.9      | 0.90           | 5.6    | 0.38           |
| 10                 | 50  | 25              | 0.5    | 37.7     | 15.2       | 0.60           | 24.4   | 0.35           | 27.8      | 0.26           | 32.2   | 0.15           | 3.8      | 0.90           | 14.8   | 0.61           |
| 11                 | 100 | 50              | 0.5    | 143      | 47.2       | 0.67           | 59.1   | 0.59           | 96.2      | 0.33           | 93.9   | 0.34           | 11.8     | 0.92           | 32.5   | 0.77           |
| 12                 | 200 | 100             | 0.5    | 293      | 162.5      | 0.45           | 165.5  | 0.44           | 301.5     | 0.03           | 287.2  | 0.02           | 41.1     | 0.86           | 76.4   | 0.74           |
| 13                 | 200 | 50              | 0.25   | 310      | 198.1      | 0.36           | 202.8  | 0.35           | 316.1     | 0.02           | 307.7  | 0.01           | 68.3     | 0.78           | 96.9   | 0.69           |
| 14                 | 200 | 50              | 0.25   | 272      | 198.1      | 0.27           | 202.8  | 0.25           | 316.1     | 0.16           | 307.7  | 0.13           | 68.3     | 0.75           | 96.9   | 0.64           |
| 15                 | 20  | 2               | 0.1    | 10.5     | 8.7        | 0.17           | 14.6   | 0.40           | 11.2      | 0.07           | 14.5   | 0.38           | 2.5      | 0.76           | 6.7    | 0.36           |
| 16                 | 50  | 5               | 0.1    | 41.5     | 30.6       | 0.26           | 38.5   | 0.07           | 44.4      | 0.07           | 48.3   | 0.16           | 11.1     | 0.73           | 20.0   | 0.52           |
| 17                 | 100 | 10              | 0.1    | 123      | 83.6       | 0.32           | 93.2   | 0.24           | 124.3     | 0.01           | 126.1  | 0.03           | 32.8     | 0.73           | 48.2   | 0.61           |
| 18                 | 200 | 10              | 0.05   | 328      | 247.4      | 0.25           | 255.7  | 0.22           | 341.5     | 0.04           | 339.1  | 0.03           | 114.3    | 0.65           | 134.8  | 0.59           |
| 19                 | 20  | 0               | 0      | 12.7     | 9.1        | 0.28           | 13.3   | 0.05           | 11.0      | 0.13           | 14.5   | 0.14           | 2.9      | 0.77           | 7.0    | 0.45           |
| 20                 | 50  | 0               | 0      | 39.6     | 33.8       | 0.15           | 42.0   | 0.06           | 45.7      | 0.15           | 50.4   | 0.27           | 13.5     | 0.66           | 21.7   | 0.45           |
| 21                 | 200 | 0               | 0      | 317      | 253.6      | 0.20           | 263.6  | 0.17           | 343.0     | 0.08           | 341.3  | 0.08           | 125.5    | 0.60           | 144.7  | 0.54           |
| <b>Rms average</b> |     |                 |        |          |            | <b>0.56</b>    |        | <b>0.4</b>     |           | <b>0.37</b>    |        | <b>0.30</b>    |          | <b>0.85</b>    |        | <b>0.62</b>    |

47

48 \*The rms difference is calculated as the square of the difference between model and measured value for each run normalized to the measured value

49

50

51 **Table S4** The line equations and the coefficient of determination for the EVAP, NVP and  
52 MY method with and without the inclusion of HOMs.

| Method   | Line function equation | Coefficient of determination |
|----------|------------------------|------------------------------|
| EVAP     | $y = 0.7027x - 7.6433$ | 0.9033                       |
| NVP      | $y = 1.0693x - 18.676$ | 0.9467                       |
| MY       | $y = 0.2799x - 7.6736$ | 0.7625                       |
| EVAP HOM | $y = 0.6988x - 14.877$ | 0.8889                       |
| NVP HOM  | $y = 1.0294x - 13.675$ | 0.9402                       |
| MY HOM   | $y = 0.352x - 1.8675$  | 0.8907                       |

53

54

55

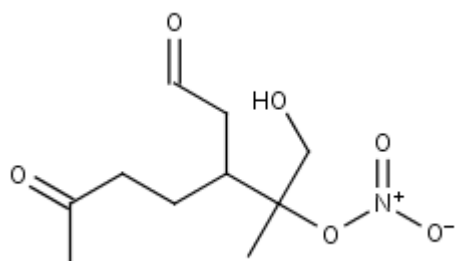

56

57 **Figure S1** LIMALNO<sub>3</sub> (MCMv3.3.1, <http://mcm.leeds.ac.uk/MCM/>).

58
